# Supplementary material
Source: publisher site journal article supplement (https://www.dovepress.com/get_supplementary_file.php?f=365398.docx)
Supplement: Supplementary file 1 [file get_supplementary_file.php]

**Appendix 1: Answers to questionnaire questions (n = 600)**

**Demographic data**

Sex Male: 307 Female: 293

Age (years) Mean 60.6 Median 61.3

BMI (kg/m2) Mean 32.3 Median 29.5

Duration of diabetes (years): Mean 11.0 Median 9.2

Insulin treatment Yes: 142 No: 458

Duration of insulin treatment (years) Mean 6.3 Median 5

Highest level of education (%) ≤Bac 65 >Bac 35

Last professional activity (%)

SCP.1 = Craftsmen, shopkeepers, managers, intermediate professions 46.8

SCP.2 = Farmers, employees, workers, other not active 53.2

Smoking (%) Never 37 Has stopped 47 Active smoker 16

Diet (%) Accepted constraints ('diet') 75 Accepted no constraints 25

Physical activity Sedentary (nothing)/ 27 Occasionally 52. Daily 29 Sport 2

In addition to diabetes, do you have any of the following health problems? (%) Overweight or obese 58 High blood pressure 54 Cholesterol 45 Gout 4

If you have any of these conditions, are they under control? (n, %)

Hypertension n = 322 Yes 98 No 1 Don't know 0

Cholesterol n = 272 Yes 94 No 4 Don't know 1

Gout 23 Yes 87 No 9 Don't know 4

Do you have any complications from diabetes (%)

Eye Kidneys Heart Foot Nerves Don't know if I have any

10 5 3 8 5 14

I know I have no complications 64

At least one complication reported: 22

**Screening questionnaire***

1. Do you consider on a scale from 1 to 10 that your diabetes is a burden (10 intolerable): Median of answers: 6

2. Have you ever not taken your treatment because some days you feel that your treatment is doing you more harm than good? (%) Yes: 12; No: 88

3. Do you consider on a scale from 1 to 10 that your diabetes impairs your quality of life (10 intolerable): Median: 6

4. Is your current HbA1c (glycosylated haemoglobin) in the target range? (%)

Yes: 62; No: 27; Don't understand the question: 4; Don't know: 7

5. Did you forget to take your medication this morning? (%) Yes: 3; No: 97

6. Have you ever not taken your medication because your memory fails you on certain days? (%) Yes: 20; No: 80

7. Are you particularly bothered by your hypoglycaemia? Scale from 0 to 10, extremely bothered; Median: 2

8. We can offer you a diabetes support program. Do you think this would be helpful to you? Scale of 1 to 10, extremely helpful; Median: 6

**Quality of care questions**

Do you know what HbA1c, glycated hemoglobin or glycosylated hemoglobin (%) is? Yes: 77, No: 23

Do you know your HbA1c target? Yes: 54, No: 37, Don't know what it is: 10

Do you have a blood glucose meter? (%) Yes: 65, No: 35

Do you measure your blood glucose? (n = 389) (%) Rarely: 15, Occasionally: 42, Every day: 25, Several times/day: 17

Is your weight stable? (%) Yes: 82, No: 18

Have you seen your GP for less than 1 year (%) Yes: 95, No: 5

Have you seen a diabetes specialist in the last 18 months (%) Yes: 36, No: 64

Have you seen an ophthalmologist in the last 18 months (%) Yes: 79, No: 21

Have you seen a cardiologist within the last 18 months (%) Yes: 62, No: 38

Is your blood pressure normal? (%) Yes: 81, No: 16, Don't know: 3

Is your cholesterol level normal? (%) Yes: 73, No: 20, Don't know: 7

Do you have a foot at risk (insensitivity, deformity) (%) Yes: 14, No: 70, Don't know: 16

Do you have a follow-up once or several times a year by a podiatrist for your feet? (%) Yes: 36, No: 64

**Psychological questions**

If you had a choice, would you choose (%) 500 euros today: 42; 1500 euros in one year: 58

In 10 years’ time, your physical appearance will probably have changed to some extent.

Do you think you will have changed not at all or very much? Scale of 0 to 10, extremely changed; Median: 6.

Is preparing for your future important to you? Scale of 0 to 10; Median: 7

In your opinion, does your future depend on you? (%) Yes: 85, No: 15

In general

Do you ever feel depressed? (%) Yes: 48, No: 52

Are you a natural (%) Optimist: 72, Pessimist: 28

Are you naturally (%) Cautious: 90, At risk: 10

Are you rather (%) Cheerful: 83, Sad: 17

Are you rather obedient to recommendations (e.g., wearing a seatbelt in the back of a car, waiting for a red light to cross)? (%) Obedient: 92, Disobedient: 8

Do you trust your doctor (%)?

Not at all, Not very much, Somewhat, Completely

1 4 39 57

Generally speaking, when you are in the habit of doing something, do you stick to it? (%) Yes: 94, No: 7

Do you ever deliberately not take your medication? (%) Yes: 12, No: 88

Do you feel that you have enough information about your disease? (%) Yes: 79, No: 21

Do you feel you have enough information about your treatment? (%) Yes: 74, No: 26

**6-question adherence questionnaire**

1. Did you forget to take your medication this morning? (%) Yes: 3, No: 97

2. Since your last visit, have you run out of medication? (%) Yes: 7, No: 93

3. Have you ever been late in taking your medication? (%) Yes: 46, No: 54

4. Have you ever not taken your medication because your memory fails you on certain days? (%) Yes: 20, No: 80

5. Have you ever not taken your treatment because some days you feel that your treatment is doing you more harm than good? (%) Yes: 12, No: 78

6. Do you think you have too much medicine to take? (%) Yes: 50, No: 51

No positive response to the Girerd questionnaire (6 questions): n = 157; 1 : n = 209 2 : n = 133 3 : n = 68 4 : n = 23 5 : n = 8 6 : n = 2

Have you ever experienced any adverse effects from your medication? (%) Yes: 40, No: 60

* In the original design of the questionnaire, these eight questions were intended to identify patients who might benefit from a support program. Note that the eighth question is the one for which the determinant analysis was used to define the nine criteria used in the calculation of the Program Helpfulness Score.
